# Supplementary material for: PLLA Coating of Active Implants for Dual Drug Release
Source: MDPI journal article supplement (doi:10.3390/molecules27041417), 2022-02-19
Supplement: s1 [file s1]

Article

# PLLA Coating of Active Implants for Dual Drug Release

Katharina Wulf <sup>1,\*</sup>, Madeleine Goblet <sup>2,†</sup>, Stefan Raggl <sup>3</sup>, Michael Teske <sup>1</sup>, Thomas Eickner <sup>1</sup>, Thomas Lenarz <sup>2</sup>, Niels Grabow <sup>1</sup> and Gerrit Paasche <sup>2,\*</sup>

<sup>1</sup> Institute for Biomedical Engineering, Medical Center, Rostock University, 18119 Rostock, Germany; michael.teske@uni-rostock.de (M.T.); thomas.eickner@uni-rostock.de (T.E.); niels.grabow@uni-rostock.de (N.G.)

<sup>2</sup> Department of Otorhinolaryngology, Head and Neck Surgery and Hearing4all Cluster of Excellence, Hannover Medical School, 30625 Hannover, Germany; goblet.madeleine@mh-hannover.de (M.G.); lenarz.thomas@mh-hannover.de (T.L.)

<sup>3</sup> MED-EL Medical Electronics, Fuerstenweg 77a, 6020 Innsbruck, Austria; stefan.raggl@medel.com (S.R.)

\* Correspondence: katharina.wulf@uni-rostock.de (K.W.); paasche.gerrit@mh-hannover.de (G.P.); Tel.: +49-381-54345520 (K.W.); Tel.: +49-511-5323808 (G.P.)

† These authors contributed equally to this work

## Section: Materials and Methods Impedance measurements of coated samples

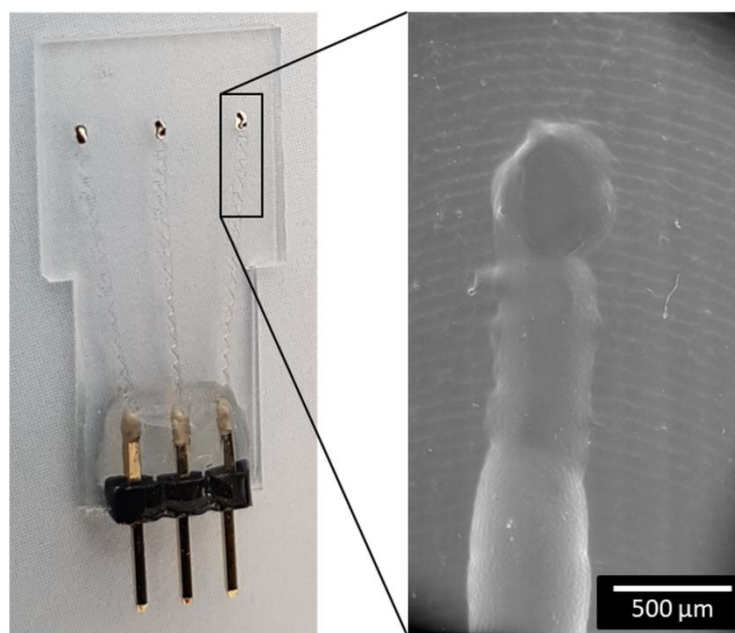

**Figure S1.** Silicone sample as used for impedance measurements; (a) uncoated sample with three Pt-contacts and the connector; (b) enlargement of one contact—coated version.

### Section Results Contact Angle Measurements

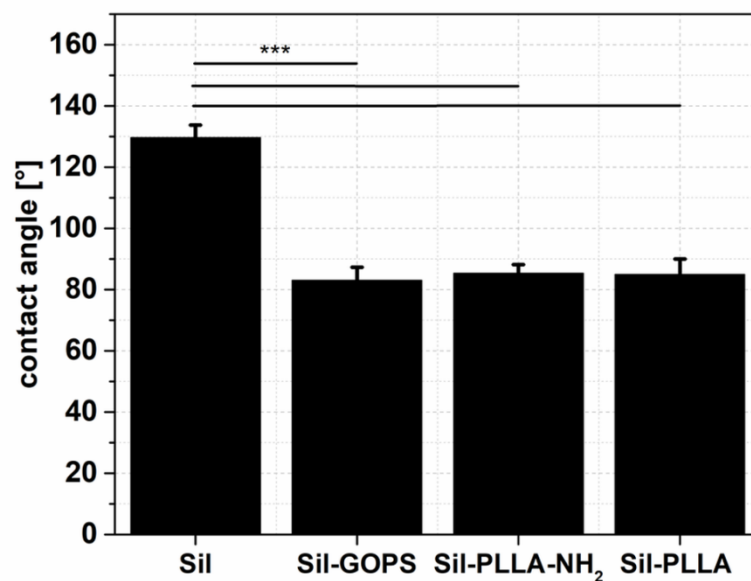

**Figure S2.** Water contact angle  $\Theta_W \pm$  standard deviation (SD) on silicone surfaces after each reaction step for sessile drop method (N = 5). \*\*\*  $p < 0.001$ .

### Section Results ATR-FTIR

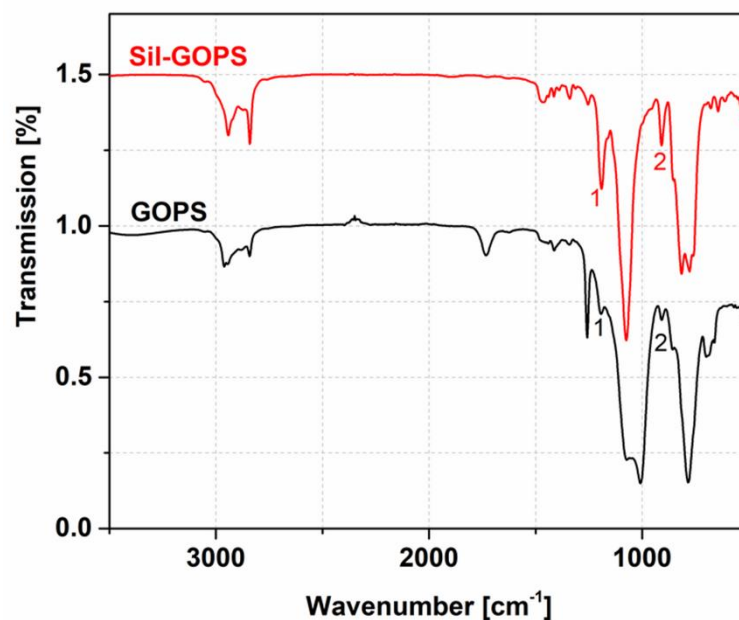

**Figure S3.** Fourier transform infrared spectra of investigated Sil-GOPS in comparison with pure GOPS in the range of 3500–500 cm<sup>-1</sup>; (1) the prominent band at 1254 cm<sup>-1</sup> depicts Si-CH<sub>2</sub> bond from the GOPS structure (2) the prominent band around 1254 cm<sup>-1</sup> represents oxirane group from the GOPS structure.

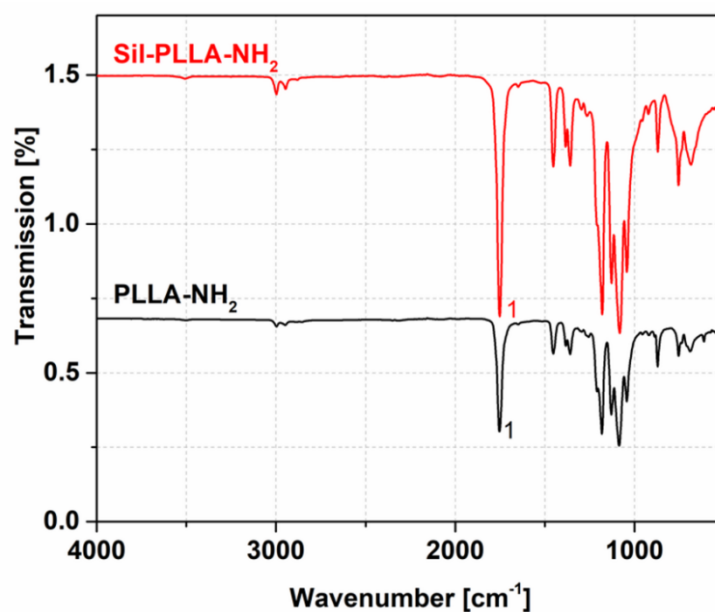

**Figure S4.** Fourier transform infrared spectra of investigated Sil-PLLA-NH<sub>2</sub> in comparison with pure PLLA-NH<sub>2</sub> in the range of 4000–500 cm<sup>-1</sup>; prominent band at 1751 cm<sup>-1</sup> corresponds to the C=O stretching vibration from the PLLA structure.

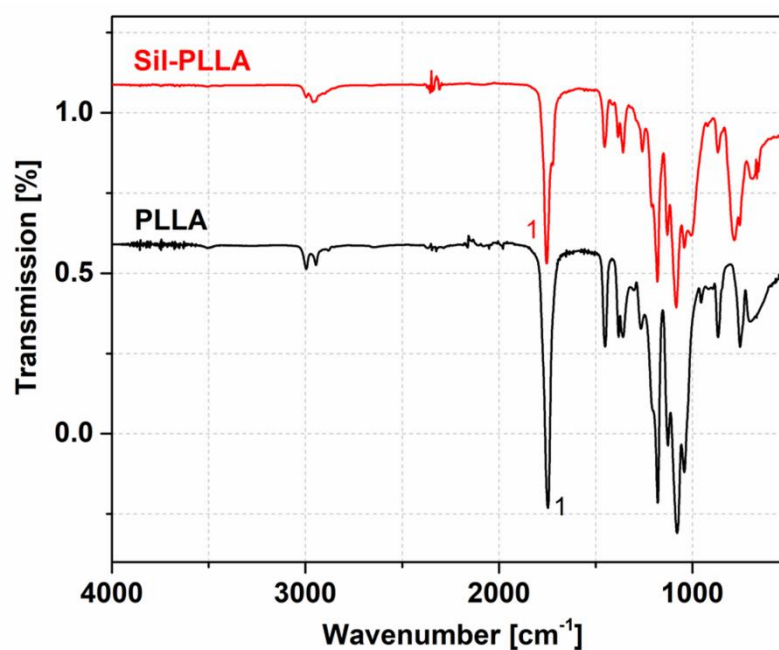

**Figure S5.** Fourier transform infrared spectra of investigated Sil-PLLA in comparison with pure PLLA in the range of 4000–500 cm<sup>-1</sup>; prominent band at 1751 cm<sup>-1</sup> corresponds to the C=O stretching vibration from the PLLA structure.

## Section Materials and Methods Immunohistochemistry

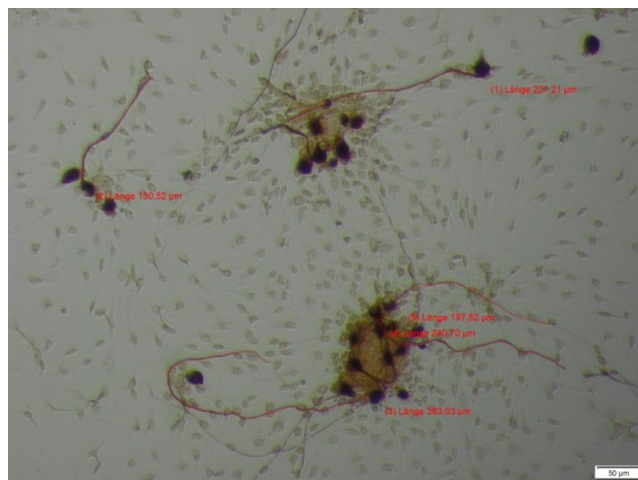

**Figure S6.** Microscopic image of stained spiral ganglion neurons (dark cell bodies) with five traced neurites (red). Treatment:  $3.2 \times 10^{-7}$  mol/L DCF. Scale bar: 50 µm.
